# Supplementary material
Source: HighWire-hosted journal article supplement (https://erj.ersjournals.com/content/54/5/1802115)
Supplement: inline-supplementary-material-1 [file inline-supplementary-material-1.pdf]

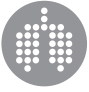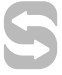

SHAREABLE PDF

**Withdrawal notice for: “Circulating RNA differences between patients with stable and progressive lung function in IPF.” Britt Clynick, Helen E. Jo, Tamera J. Corte, Ian N. Glaspole, Christopher Grainge, Peter M.A. Hopkins, Paul N. Reynolds, Sally Chapman, E. Haydn Walters, Christopher Zappala, Gregory J. Keir, Wendy A. Cooper, Annabelle M. Mahar, Samantha Ellis, Nicole Goh, Svetlana Baltic, Marissa Ryan, Dino Tan and Yuben Moodley. *Eur Respir J* 2019; in press.**

This article has been withdrawn from publication at the request of the authors.

Copyright ©ERS 2019
